# Supplementary material
Source: publisher figshare collection journal article supplement (https://gsajournals.figshare.com/ndownloader/files/14645189)
Supplement: Supplementary file 1 [file 14645189]

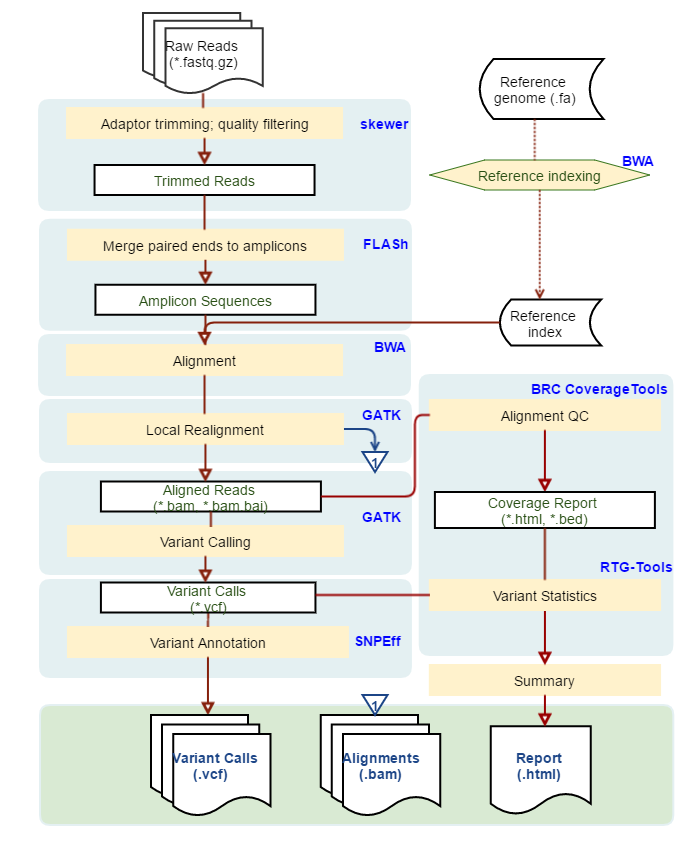


**Figure S1.** Workflow for analysis of sequencing data from the yeast spliceosome targeted sequencing panel. Kindly provided by University of Wisconsin Bioinformatic Resource Center. See Materials and Methods section for a detailed explanation.
